# Supplementary material
Source: PubMed Central journal article supplement (PMC2446706)
Supplement: supp_76_7_3164__1.pdf [file supp_76_7_3164__1.pdf]

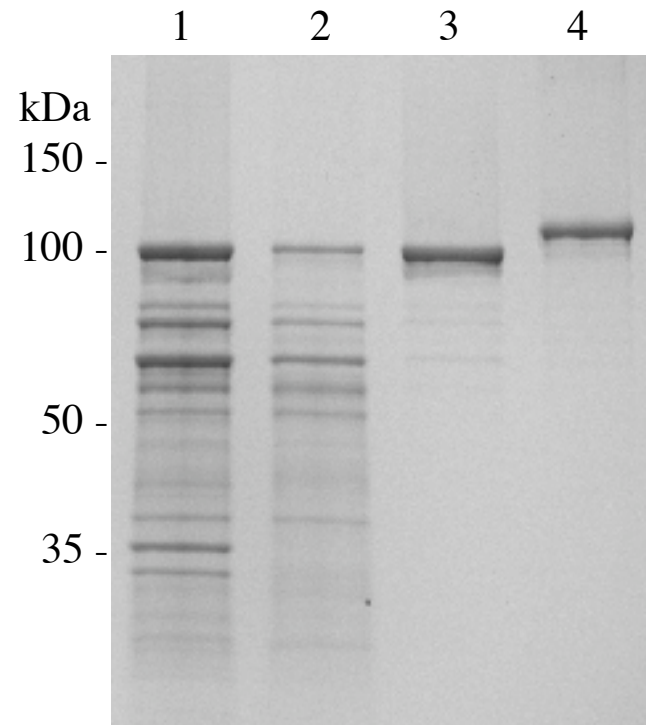

Supplemental FIG 1. Chromatographic purification of *S. japonicum* paramyosin without the thioredoxin fusion protein. A pET-30 based plasmid construct containing paramyosin was expressed and purified similarly as described in methods. Lane 1, inclusion body preparation; lane 2, anion exchange chromatography; lane 3, size exclusion chromatography; lane 4, purified *S. japonicum* paramyosin with the thioredoxin fusion protein.
